# Supplementary material
Source: Springer Nature journal article supplement (https://www.springermedizin.de/resource/supplementary/12889_2010_2647_MOESM3_ESM.pdf/9486862)

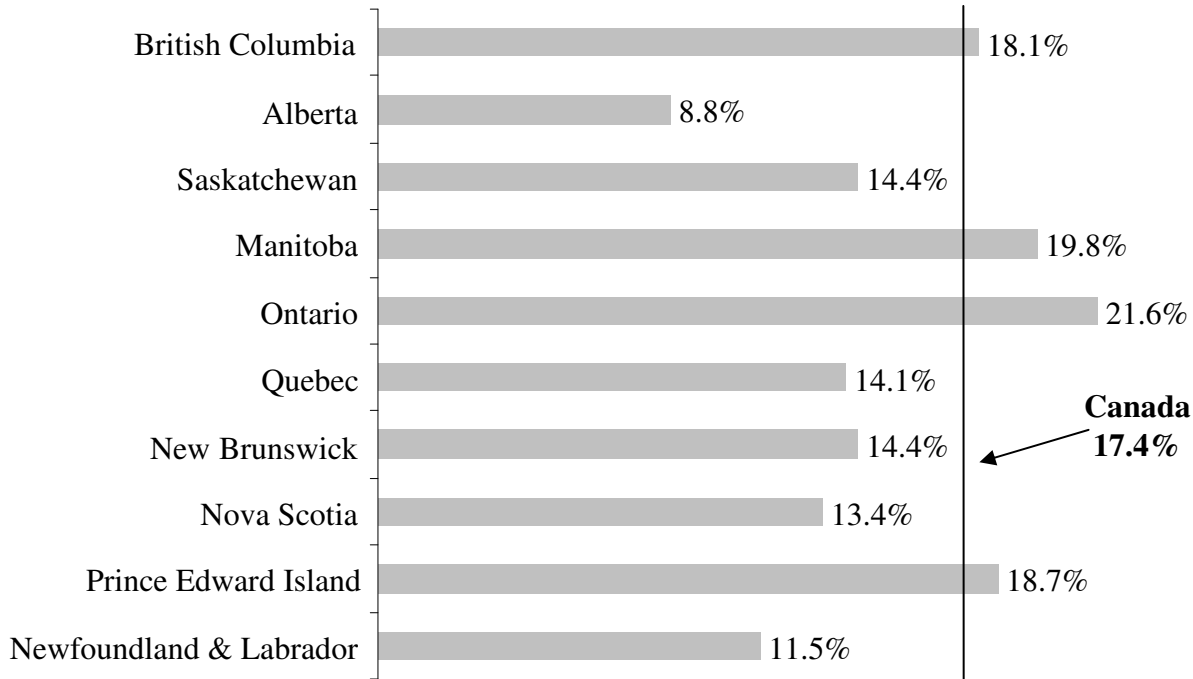

Supplement: MOESM3 [file 9486862]
